# Supplementary material for: Modulation of osteogenic and myogenic differentiation by a phytoestrogen formononetin via p38MAPK-dependent JAK-STAT and Smad-1/5/8 signaling pathways in mouse myogenic progenitor cells
Source: PubMed Central journal article supplement (PMC6594940; doi:10.1038/s41598-019-45793-w), 2019-06-26
Supplement: 41598_2019_45793_MOESM1_ESM.pdf [file 41598_2019_45793_MOESM1_ESM.pdf]

**Modulation of osteogenic and myogenic differentiation by a phytoestrogen formononetin via p38MAPK-dependent JAK-STAT and Smad-1/5/8 signaling pathways in mouse myogenic progenitor cells**

Ilavenil Soundharrajan<sup>1</sup>†, Da Hye Kim<sup>2</sup>†, Palaniselvam Kuppusamy<sup>1</sup>, Ki Choon Choi\*<sup>1</sup>

<sup>1</sup> Grassland and Forage Division, National Institute of Animal Science, Rural Development Administration, Cheonan, Republic of Korea-31000.

<sup>2</sup>Center for Research on Environmental Disease, College of Medicine, University of Kentucky, 1095 VA Drive, Lexington, KY 40536 USA.

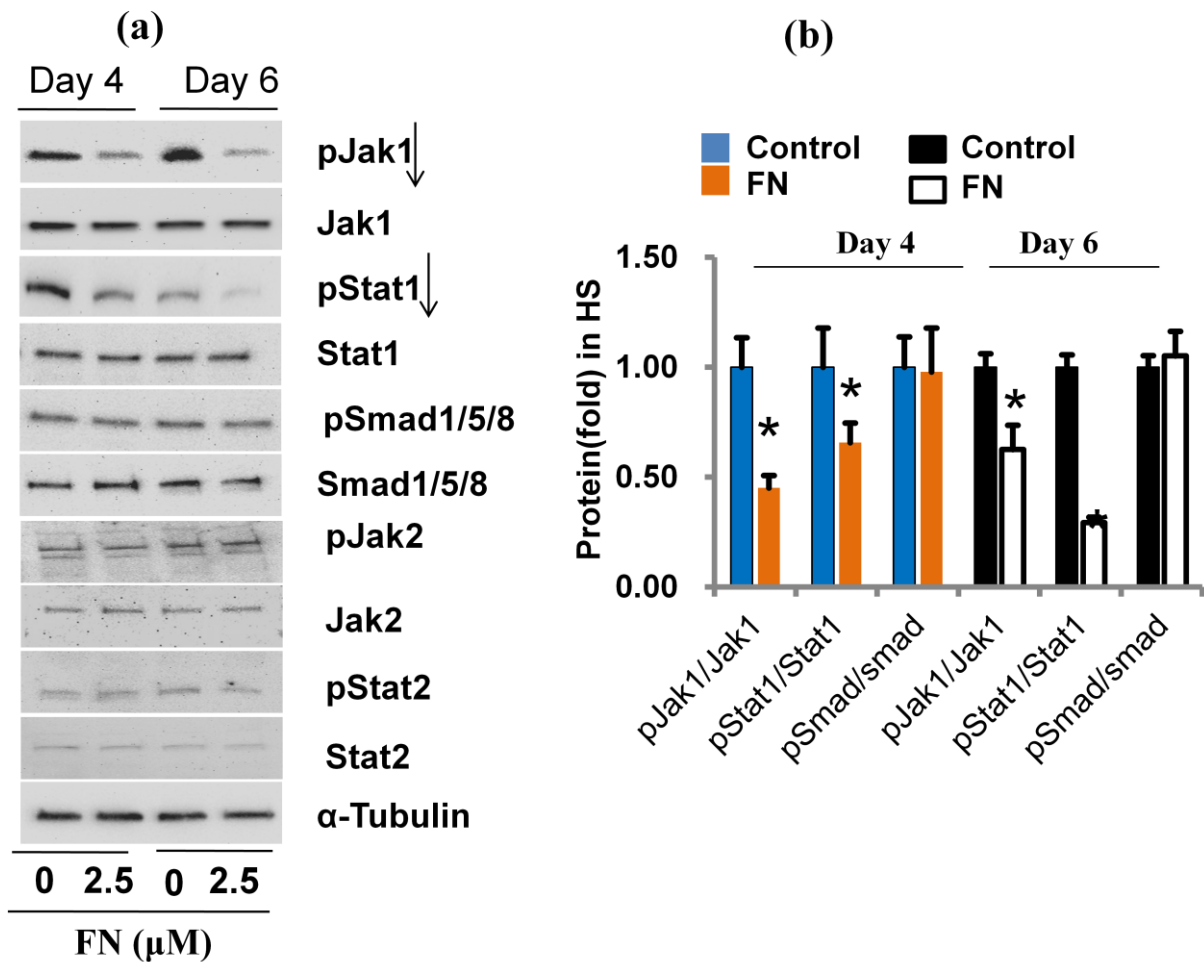

**Supplementary Figure S1.** FN role in JAKs-STATs and Smad1/5/8 signaling pathways in experimental cells in 2% horse serum medium (HS). Cells were treated with FN in HS medium for six days. Proteins were harvested and the phosphorylation levels of JAKs-STATs and Smad 1/5/8 proteins were analyzed on day 4 and 6 by immunoblotting using specific antibodies against targets. JAK1 and STAT1 phosphorylation level was downregulated while SMAD and JAK2/STAT2 phosphorylation was not altered by FN treatment (a) JAKs-STATs and Smad 1/5/8 phosphorylation level after treatment with FN in HS medium. (b) The intensity of protein bands was quantified by densitometry using Image J software. Bars display mean  $\pm$  SEM of three experimental replicates. \* $p < 0.05$  represents a statistically significant difference between control and treatment.

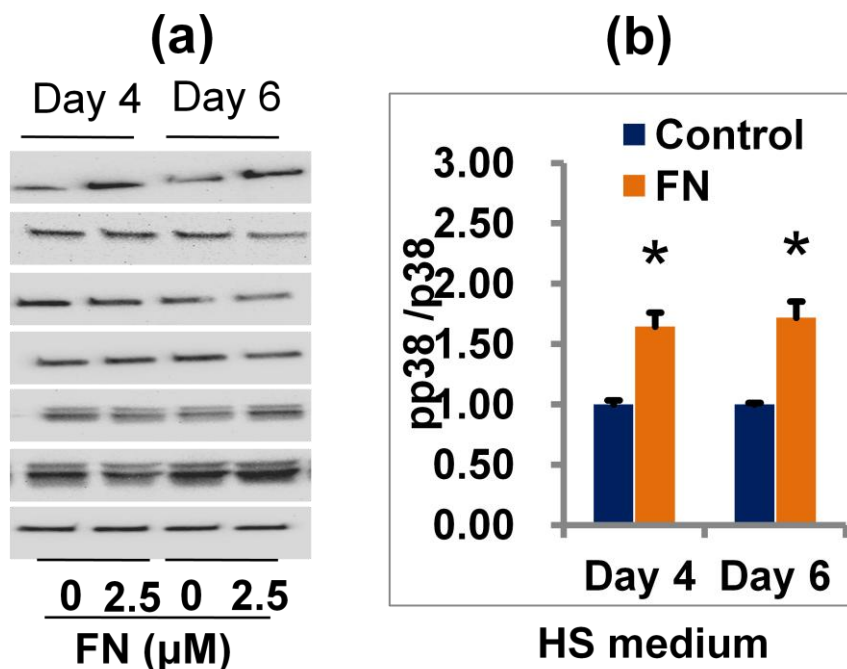

**Supplementary Figure S2.** Effect of FN on p38MAPK, AKT and p44/42 signaling pathways in experimental cells in HS medium. Cells were treated with 2.5 $\mu\text{M}$  FN in the presence of HS medium for six days. Proteins were then extracted and analyzed by immunoblotting using specific antibodies against p38MAPK, AKT, and p44/42 (a) Regulation of p38MAPK, AKT, and p44/42 signaling by FN in HS medium. (b) The intensity of protein bands was determined by Image J software. Bars display mean  $\pm$  SEM of three experimental replicates. \* $p < 0.05$  indicates a statistically significant difference between treatment and non-treatment.
